# Supplementary material
Source: PubMed Central journal article supplement (PMC2924602)
Supplement: jlb.0110051_1.pdf [file jlb.0110051_1.pdf]

A

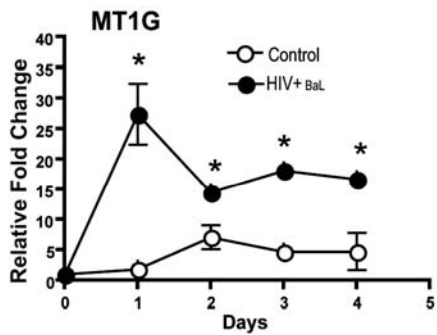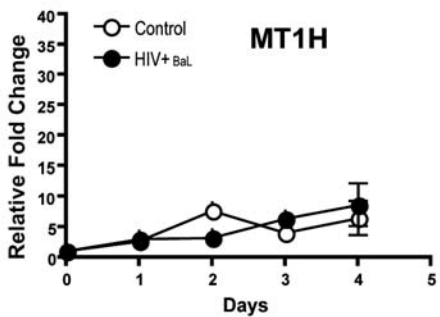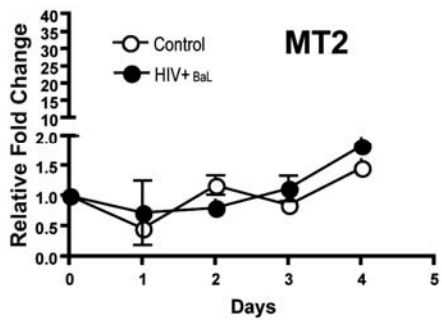

B

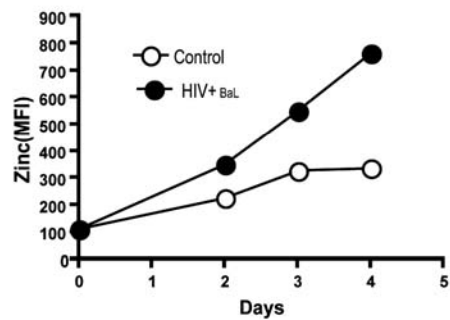

**Supplemental Figure 1: HIV increases MT-1 gene expression and intracellular zinc levels in monocytes.**

(A) MT-1 isoforms and MT-2 genes were monitored in elutriated monocytes over a 4-day period in the presence or absence of 50 ng of HIV-1 (Ba-L strain). Cells were harvested at each time point, total RNA isolated, and real-time PCR for MT-1 (isoforms G and H) and MT2 was performed. Time points (control vs. HIV+) were compared using paired *t* test; \**P* <0.05. (B) Intracellular zinc levels determined by DCF-uptake were measured by flow cytometry in cells exposed/infected with HIV-1.
